# Supplementary material for: Exponential magnetophoretic gradient for the direct isolation of basophils from whole blood in a microfluidic system
Source: Royal Society of Chemistry journal article supplement (doi:10.1039/d2lc00154c), 2022-01-01

DLD waste from 600  $\mu\text{L}$  of  
washed blood  
(gated on  $\text{CD45}^+/\text{SSC}^{\text{low}}$ )

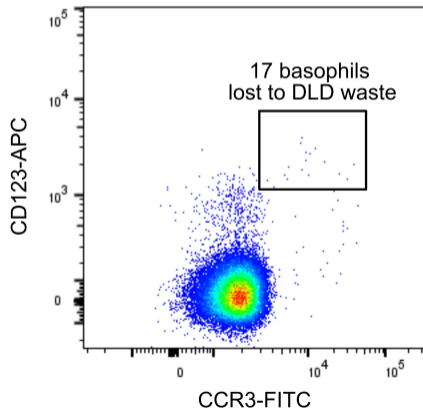

DLD waste from 100  $\mu\text{L}$  of  
unwashed whole blood  
(gated on  $\text{CD45}^+/\text{SSC}^{\text{low}}$ )

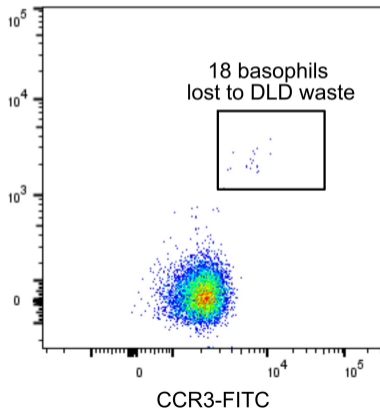

Supplement: d2lc00154c2.pdf [file d2lc00154c2.pdf]
