# Supplementary figures and images for: Exponential magnetophoretic gradient for the direct isolation of basophils from whole blood in a microfluidic system
Source: Royal Society of Chemistry journal article supplement (doi:10.1039/d2lc00154c), 2022-01-01

A

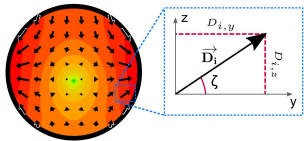

$$\bar{\zeta} = \frac{\sum_{i=1}^n \|\vec{D}_i\| \arctan\left(\frac{D_{i,z}}{|D_{i,y}|}\right)}{\sum_{i=1}^n \|\vec{D}_i\|}$$

B

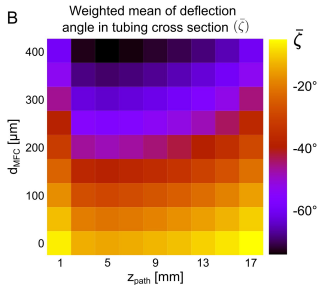

C

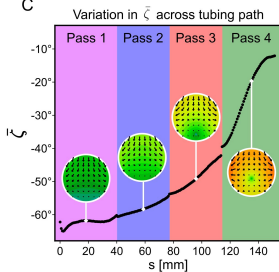

Supplement: d2lc00154c3.pdf [file d2lc00154c3.pdf]

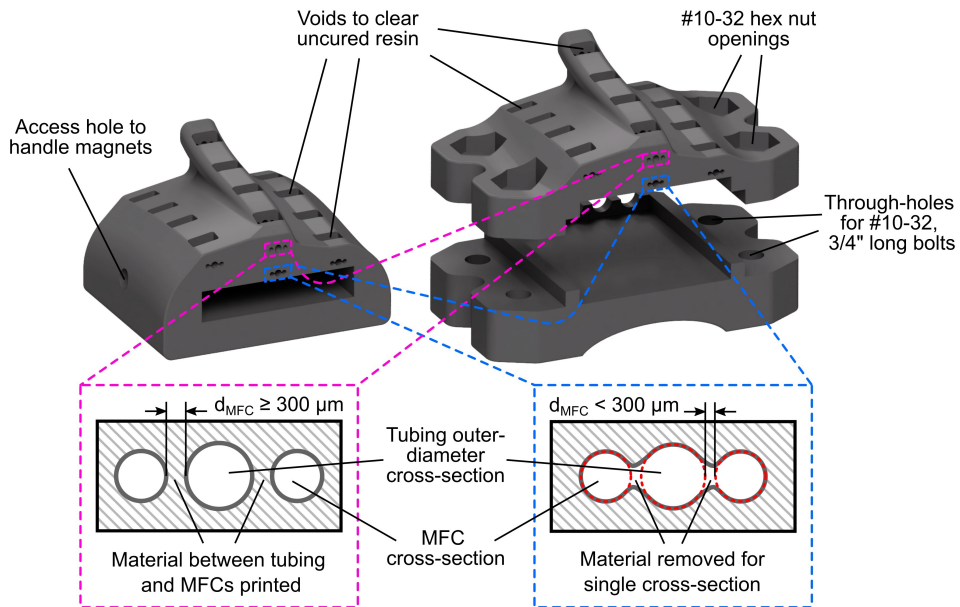

Supplement: d2lc00154c5.pdf [file d2lc00154c5.pdf]

100  $\mu$ L WBC control volume  
(input to MSD)

Recovered from MSD run at 6 mL/hr

Recovered from MSD run at 15 mL/hr

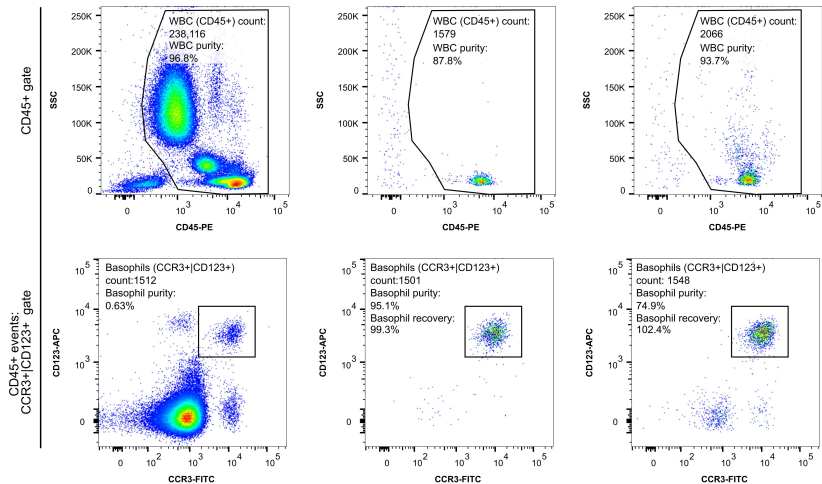

Supplement: d2lc00154c6.pdf [file d2lc00154c6.pdf]

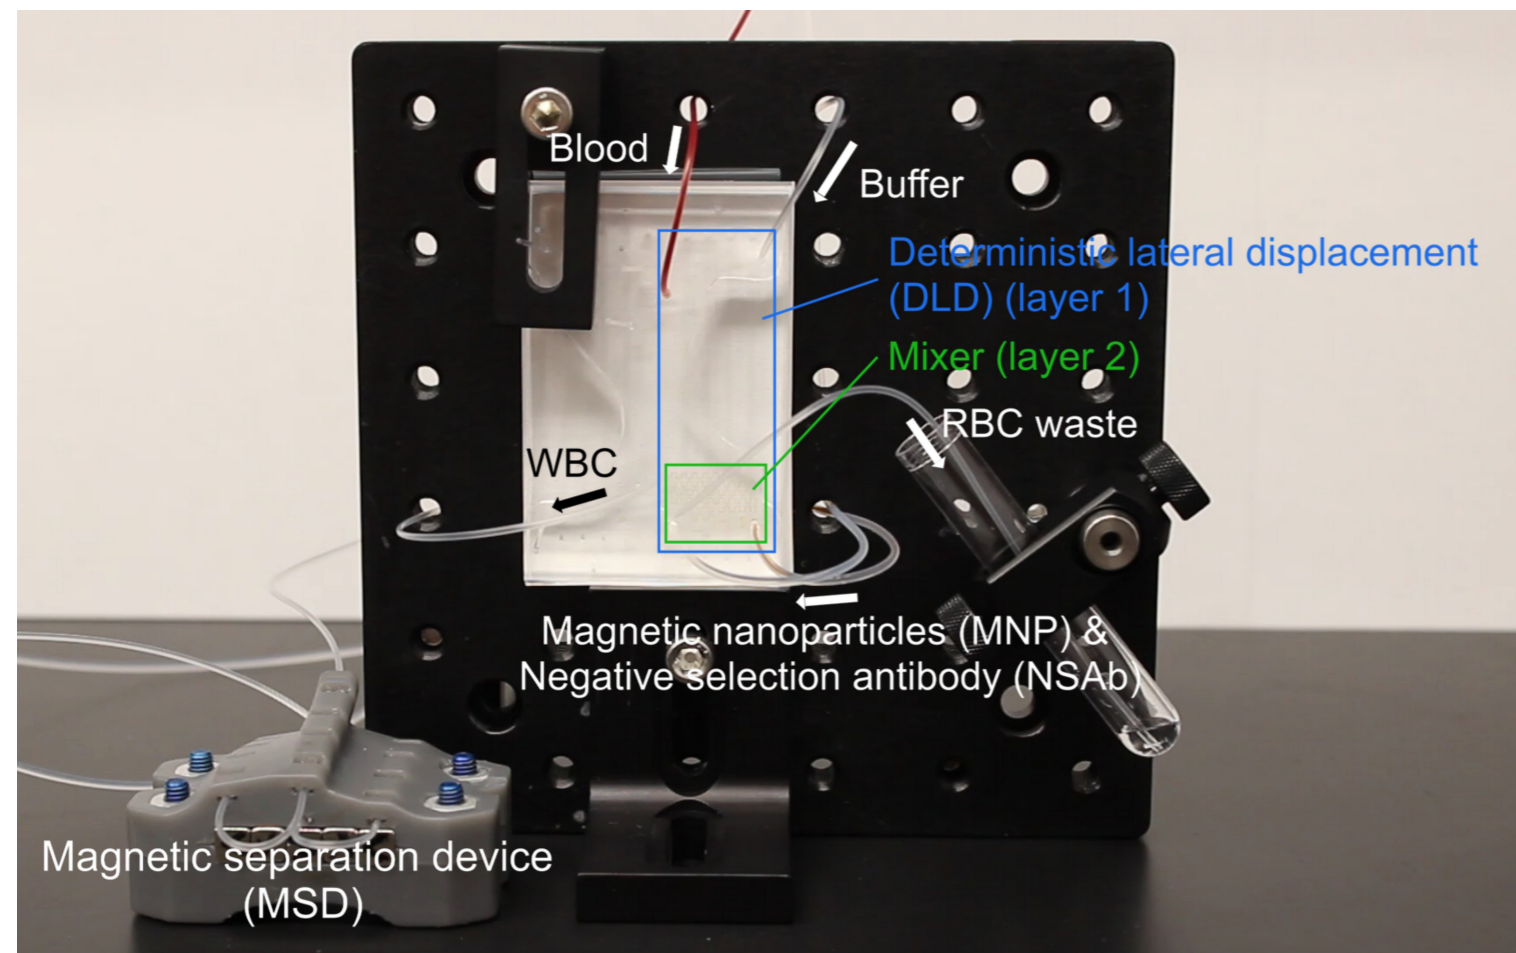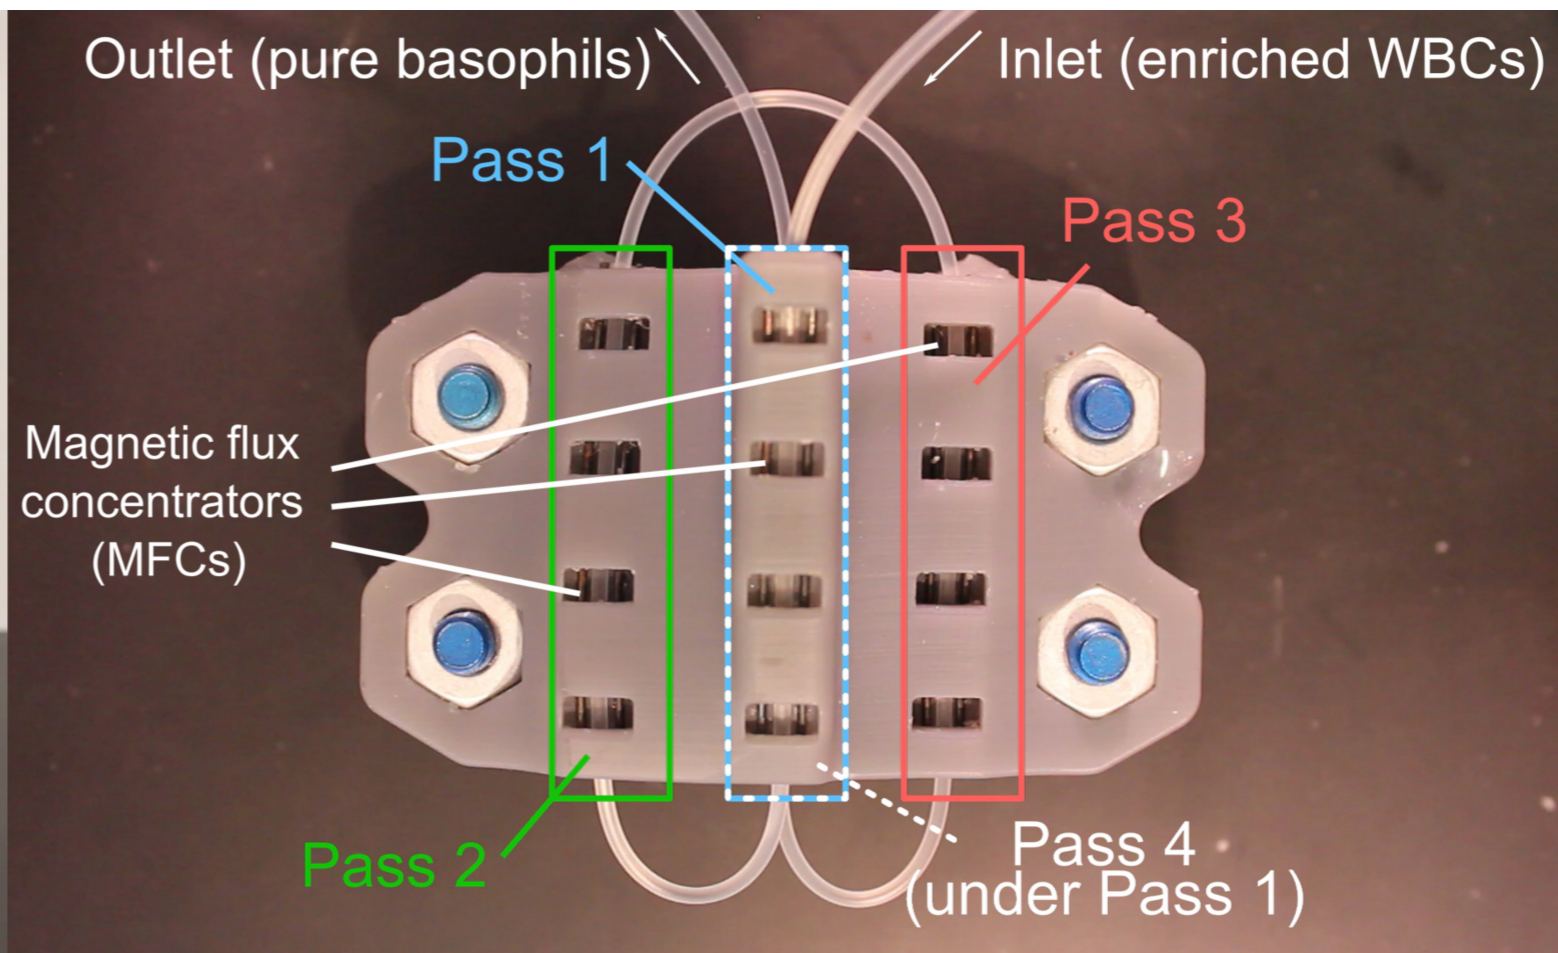

Supplement: d2lc00154c8.pdf [file d2lc00154c8.pdf]
